# Supplementary material
Source: PubMed Central journal article supplement (PMC2646860)
Supplement: 97320630003255S1.pdf [file 97320630003255S1.pdf]

### Supplementary material

| S. NO | Structure | Chemical formula                                                                          | Binding energies                                                |                                                                  |
|-------|-----------|-------------------------------------------------------------------------------------------|-----------------------------------------------------------------|------------------------------------------------------------------|
|       |           |                                                                                           | HAT Enzyme                                                      | SERCA Enzyme                                                     |
| 1     |           | DAH1 - 5-hydroxy-7-(4-hydroxy-3-methoxyphenyl)-1-(4-methoxyphenyl)-1,4,6-heptatrien-3-one | (i) -29.18<br>(ii) -164.279<br>(iii) 19.2593<br>(iv) -144.562   | (i) -30.2461<br>(ii) -106.192<br>(iii) 17.5476<br>(iv) -88.1829  |
| 2     |           | DAH2 - 5-hydroxy-7-(4-hydroxy-3-methoxyphenyl)-1-phenyl-1,4,6-heptatrien-3-one            | (i) -26.2266<br>(ii) -158.909<br>(iii) 14.3788<br>(iv) -144.468 | (i) -25.6674<br>(ii) -93.8525<br>(iii) 5.5588<br>(iv) -88.0193   |
| 3     |           | DAH3 - 5-hydroxy-1,7-di(4-hydroxyphenyl)-1,4,6-heptatrien-3-one                           | (i) -24.7644<br>(ii) -157.339<br>(iii) 10.5144<br>(iv) -146.824 | (i) -22.4891<br>(ii) -94.5298<br>(iii) 1.3044<br>(iv) -93.2254   |
| 4     |           | DAH4 - 5-hydroxy-7-(4-hydroxy-3-methoxyphenyl)-1-(4-hydroxyphenyl)-1,4,6-heptatrien-3-one | (i) -26.5945<br>(ii) -161.974<br>(iii) 15.9454<br>(iv) -145.986 | (i) -29.1099<br>(ii) -98.3877<br>(iii) 0.068099<br>(iv) -98.4211 |
| 5     |           | CURCUMIN - 1E,6E)-1,7-bis(4-hydroxy-3-methoxyphenyl)hepta-1,6-diene-3,5-dione             | (i) -17.0122<br>(ii) -166.369<br>(iii) 10.8862<br>(iv) -112.07  | (i) -20.03916<br>(ii) -108.678<br>(iii) 12.3604<br>(iv) -81.7927 |

| S.No | Energy total | Compound       |
|------|--------------|----------------|
| 1    | -182.4       | 5388781        |
| 2    | -182         | 5317600        |
| 3    | -181         | 167551         |
| 4    | -170         | 528158         |
| 5    | -161         | 5318148        |
| 6    | -146         | ZINC 02243778  |
| 7    | -141         | ZINC 05023674  |
| 8    | -135         | ZINC 1045599   |
| 9    | -133         | ZINC 057722412 |
| 10   | -112         | Curcumin       |

**Table 2:** The results of top 10 best docking compounds on Histone acetyltransferase enzyme

| S.No | Compound | E. Tot (Curcumin unbound) | E. Tot (Curcumin bound) |
|------|----------|---------------------------|-------------------------|
| 1    | DAH1     | -88.182                   | -88.36                  |
| 2    | DAH2     | -88.01                    | -97.05                  |
| 3    | DAH3     | -93.22                    | -99.08                  |
| 4    | DAH4     | -98.42                    | -107.66                 |

**Table 3:** Showing comparative docking energies of diarylheptanoids when they are docked to SERCA enzyme and to curcumin bound SERCA enzyme

| S No. | Compound | SERCA enzyme | Curcumin bound SERCA enzyme |
|-------|----------|--------------|-----------------------------|
| 1     | DAH1     | Ser610       | Ile931                      |
|       |          | Asn330       | Arg325                      |
| 2     | DAH2     | Arg325       | Ser610                      |
| 3     | DAH3     | Arg325       | Ser610                      |
|       |          | Trp932       | Trp932                      |
| 4     | DAH4     | Arg325       | Ser610                      |
|       |          | Trp932       |                             |

**Table 4:** Showing residues forming hydrogen bond interactions at the active site.
